# Supplementary material for: Enhanced risk stratification in early-stage endometrial cancer: Integrating Molucular-L1CAM Classification and Simplified L1CAM/p53 Categorization
Source: Preprints.org preprint supplement (doi:10.20944/preprints202308.0879.v1), 2023-08-11
Supplement: Supplementary file 1 [file supplementary]

| Table S1. Primer sequences for POLE Sanger sequencing | | |
| --- | --- | --- |
| Exon | Sequences | |
| Exon9 | Forward | 5′-TCTTTTAACAACCAGAGGGAGGT-3′ |
| Reverse | 5′-TTGCTCCCATTCCTGGACTAA-3′ |
| Exon13 | Forward | 5′-GCCCAGTTTTGCCAGTTCT-3′ |
| Reverse | 5′-GAGCGGGCTGGCATACAT-3′ |
| Exon14 | Forward | 5′-CTGTGCCGGTCTCCTTACTGT-3′ |
| Reverse | 5′-GGGACATCCACCTCCATTCAG-3′ |
